# Supplementary material
Source: Springer Nature journal article supplement (https://www.springermedizin.de/resource/supplementary/12967_2013_1659_MOESM5_ESM.pdf/9574562)

CEA specificity

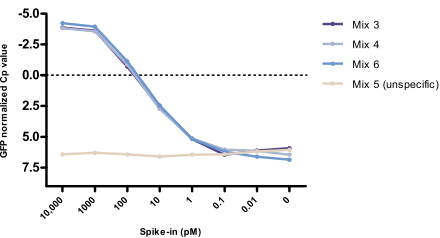

TFRC specificity

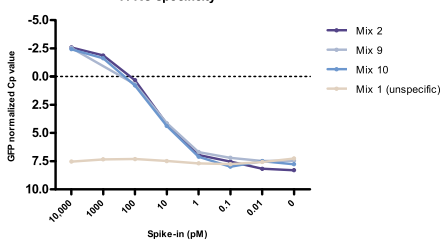

MIF specificity

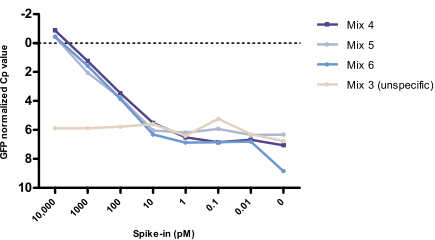

OPN specificity

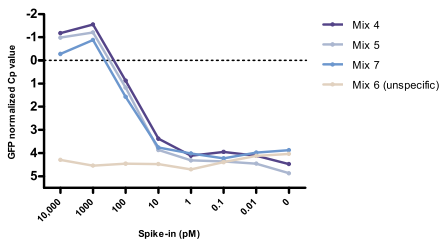

TFF3 specificity

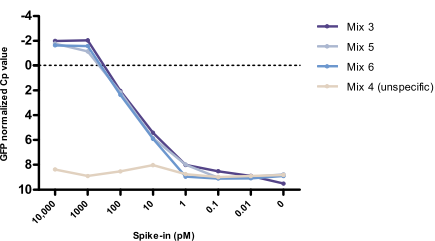

NSE specificity

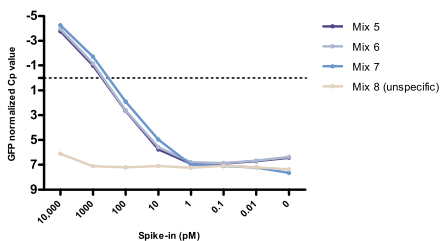

IL8 specificity

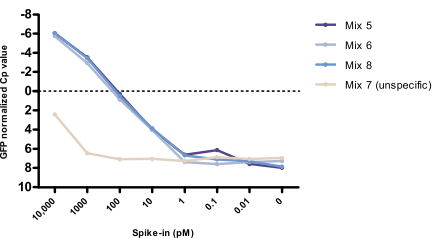

s100A8 specificity

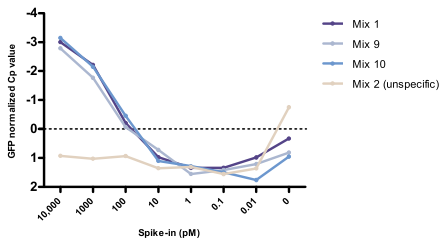

Supplement: MOESM5 [file 9574562]
